# Supplementary material for: A rhenium catalyst with bifunctional pyrene groups boosts natural light-driven CO2 reduction
Source: Royal Society of Chemistry journal article supplement (doi:10.1039/d0gc03111a), 2020-01-01
Supplement: d0gc03111a1.pdf [file d0gc03111a1.pdf]

## Supplementary Information

### **Rhenium Catalyst with Bifunctional Pyrene Groups Boosts Natural Light-Driven CO<sub>2</sub> Reduction**

Li-Qi Qiu,<sup>†a</sup> Kai-Hong Chen,<sup>†a</sup> Zhi-Wen Yang,<sup>a</sup> and Liang-Nian He<sup>\*a</sup>

<sup>a</sup>State Key Laboratory of Elemento-Organic Chemistry, Nankai University, Tianjin 300071, China.

## Table of Contents

|                                                     |    |
|-----------------------------------------------------|----|
| 1. Synthetic procedures.....                        | 3  |
| 2. Crystallographic data of 4,4'-dipyrenyl-Re ..... | 3  |
| 3. Photocatalytic experiments.....                  | 6  |
| 4. Photoluminescence experiments .....              | 11 |
| 5. Transient absorption spectroscopy .....          | 13 |
| 6. Photo-electrochemical measurements .....         | 14 |
| 7. ESI-HRMS spectra and FT-IR spectra .....         | 16 |
| 8. Computational details .....                      | 17 |
| 9. NMR spectra.....                                 | 18 |
| 10. Supplementary references .....                  | 19 |

## 1. Synthetic procedures

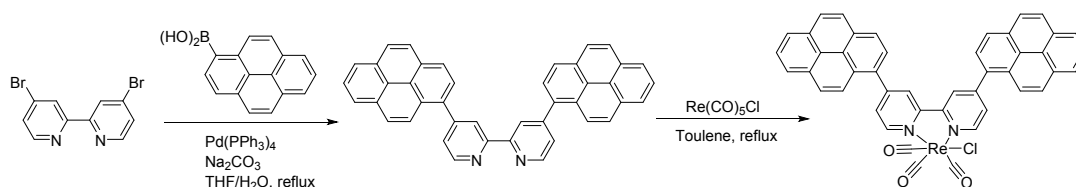

**Fig. S1** Synthesis of  $\text{Re}[4,4'\text{-di(pyren-1-yl)-2,2'-bipyridine}](\text{CO})_3\text{Cl}$  catalyst.

## 2. Crystallographic data of 4,4'-dipyrenyl-Re

**Table S1** Crystal data and structure refinement for 4,4'-dipyrenyl-Re

| Identification code                           | 4,4'-dipyrenyl-Re                                           |
|-----------------------------------------------|-------------------------------------------------------------|
| Empirical formula                             | $\text{C}_{45}\text{H}_{24}\text{ClN}_2\text{O}_3\text{Re}$ |
| Formula weight                                | 862.31                                                      |
| Temperature/K                                 | 133.15                                                      |
| Crystal system                                | orthorhombic                                                |
| Space group                                   | Pnma                                                        |
| $a/\text{\AA}$                                | 7.2328(14)                                                  |
| $b/\text{\AA}$                                | 19.384(4)                                                   |
| $c/\text{\AA}$                                | 25.550(5)                                                   |
| $\alpha/^\circ$                               | 90                                                          |
| $\beta/^\circ$                                | 90                                                          |
| $\gamma/^\circ$                               | 90                                                          |
| Volume/ $\text{\AA}^3$                        | 3582.1(12)                                                  |
| Z                                             | 4                                                           |
| $\rho_{\text{calc}}/\text{g/cm}^3$            | 1.599                                                       |
| $\mu/\text{mm}^{-1}$                          | 3.512                                                       |
| F (000)                                       | 1696                                                        |
| Crystal size/ $\text{mm}^3$                   | $0.26 \times 0.16 \times 0.14$                              |
| Radiation                                     | $\text{MoK}\alpha$ ( $\lambda = 0.71073$ )                  |
| $2\theta$ range for data collection/ $^\circ$ | 3.188 to 55.752                                             |
| Index ranges                                  | $-9 \leq h \leq 9, -25 \leq k \leq 25, -31 \leq l \leq 33$  |
| Reflections collected                         | 40175                                                       |
| Independent reflections                       | 4396 [Rint = 0.0607, Rsigma = 0.0286]                       |
| Data/restraints/parameters                    | 4396/0/241                                                  |
| Goodness-of-fit on $F^2$                      | 1.244                                                       |
| Final R indexes [ $I \geq 2\sigma(I)$ ]       | R1 = 0.0529, wR2 = 0.1233                                   |
| Final R indexes [all data]                    | R1 = 0.0573, wR2 = 0.1251                                   |
| Largest diff. peak/hole / $e \text{\AA}^{-3}$ | 1.06/-2.02                                                  |

**Table S2** Bond Lengths for **4,4'-dipyrenyl-Re**

| Atom | Atom            | Length/Å  | Atom | Atom | Length/Å  |
|------|-----------------|-----------|------|------|-----------|
| Re1  | Cl1             | 2.480(3)  | C15  | C16  | 1.406(11) |
| Re1  | N1              | 2.176(5)  | C16  | C17  | 1.400(15) |
| Re1  | N1 <sup>1</sup> | 2.176(5)  | C17  | C18  | 1.447(11) |
| Re1  | C1              | 1.943(11) | C17  | C28  | 1.410(13) |
| Re1  | C2 <sup>1</sup> | 1.918(7)  | C18  | C19  | 1.332(15) |
| Re1  | C2              | 1.918(7)  | C19  | C20  | 1.430(15) |
| O1   | C1              | 1.124(13) | C20  | C21  | 1.434(15) |
| O2   | C2              | 1.152(9)  | C20  | C29  | 1.434(10) |
| N1   | C4              | 1.355(8)  | C21  | C22  | 1.330(17) |
| N1   | C8              | 1.341(8)  | C22  | C23  | 1.399(13) |
| C4   | C5              | 1.376(10) | C23  | C24  | 1.428(14) |
| C5   | C6              | 1.367(12) | C24  | C25  | 1.442(12) |
| C6   | C7              | 1.385(12) | C24  | C29  | 1.394(14) |
| C6   | C14             | 1.488(10) | C25  | C26  | 1.340(14) |
| C7   | C8              | 1.396(9)  | C26  | C27  | 1.430(12) |
| C8   | C8 <sup>1</sup> | 1.493(13) | C27  | C28  | 1.431(10) |
| C14  | C15             | 1.391(12) | C28  | C29  | 1.445(13) |
| C14  | C27             | 1.427(12) |      |      |           |

**Table S3** Bond Angles for **4,4'-dipyrenyl-Re**

| Atom            | Atom | Atom            | Angle/°   | Atom | Atom | Atom | Angle/°   |
|-----------------|------|-----------------|-----------|------|------|------|-----------|
| N1              | Re1  | C11             | 84.03(15) | C15  | C14  | C27  | 120.1(8)  |
| N1 <sup>1</sup> | Re1  | C11             | 84.03(15) | C27  | C14  | C6   | 121.9(8)  |
| N1              | Re1  | N1 <sup>1</sup> | 74.3(3)   | C14  | C15  | C16  | 121.9(9)  |
| C1              | Re1  | C11             | 175.7(3)  | C17  | C16  | C15  | 119.1(9)  |
| C1              | Re1  | N1              | 92.6(3)   | C16  | C17  | C18  | 121.0(9)  |
| C1              | Re1  | N1 <sup>1</sup> | 92.6(3)   | C16  | C17  | C28  | 119.7(7)  |
| C2              | Re1  | C11             | 94.0(2)   | C28  | C17  | C18  | 119.2(9)  |
| C2 <sup>1</sup> | Re1  | C11             | 94.0(2)   | C19  | C18  | C17  | 121.2(9)  |
| C2 <sup>1</sup> | Re1  | N1 <sup>1</sup> | 99.6(2)   | C18  | C19  | C20  | 121.4(8)  |
| C2              | Re1  | N1              | 99.6(2)   | C19  | C20  | C21  | 124.2(8)  |
| C2 <sup>1</sup> | Re1  | N1              | 173.8(2)  | C19  | C20  | C29  | 120.0(9)  |
| C2              | Re1  | N1 <sup>1</sup> | 173.8(2)  | C21  | C20  | C29  | 115.8(10) |
| C2              | Re1  | C1              | 89.1(3)   | C22  | C21  | C20  | 122.8(9)  |
| C2 <sup>1</sup> | Re1  | C1              | 89.1(3)   | C21  | C22  | C23  | 122.1(11) |
| C2 <sup>1</sup> | Re1  | C2              | 86.4(4)   | C22  | C23  | C24  | 118.0(11) |
| C4              | N1   | Re1             | 125.0(5)  | C23  | C24  | C25  | 121.2(10) |
| C8              | N1   | Re1             | 117.7(4)  | C29  | C24  | C23  | 120.1(9)  |
| C8              | N1   | C4              | 117.3(6)  | C29  | C24  | C25  | 118.6(9)  |
| O1              | C1   | Re1             | 178.4(10) | C26  | C25  | C24  | 121.1(9)  |
| O2              | C2   | Re1             | 179.8(8)  | C25  | C26  | C27  | 121.9(8)  |
| N1              | C4   | C5              | 121.9(7)  | C14  | C27  | C26  | 123.9(7)  |
| C6              | C5   | C4              | 121.7(7)  | C14  | C27  | C28  | 117.3(8)  |
| C5              | C6   | C7              | 116.5(7)  | C26  | C27  | C28  | 118.6(8)  |
| C5              | C6   | C14             | 122.8(8)  | C17  | C28  | C27  | 121.5(8)  |
| C7              | C6   | C14             | 120.6(8)  | C17  | C28  | C29  | 120.2(7)  |
| C6              | C7   | C8              | 120.1(7)  | C27  | C28  | C29  | 118.2(8)  |
| N1              | C8   | C7              | 122.3(6)  | C20  | C29  | C28  | 118.0(9)  |
| N1              | C8   | C81             | 115.0(4)  | C24  | C29  | C20  | 121.0(9)  |
| C7              | C8   | C81             | 122.6(4)  | C24  | C29  | C28  | 121.0(7)  |
| C15             | C14  | C6              | 118.0(8)  |      |      |      |           |

### 3. Photocatalytic experiments

**Table S4** TON for CO production vs. gas for **4,4'-dipyrenyl-Re** and  $\text{Re}(\text{bpy})(\text{CO})_3\text{Cl}$  under a white LED light. Products below detectable limit are labelled as NA.

| Complex                                       | Concentration | gas           | Time | $n_{\text{co}}/\mu\text{mol}$ | $\text{TON}_{\text{CO}}$ | $\text{TON}_{\text{H}_2}$ |
|-----------------------------------------------|---------------|---------------|------|-------------------------------|--------------------------|---------------------------|
| 4,4'-dipyrenyl-Re                             | 0.05 mM       | $\text{CO}_2$ | 3 h  | $20.64\pm 0.75$               | $138\pm 5$               | NA                        |
| 4,4'-dipyrenyl-Re                             | 0.05 mM       | Ar            | 3 h  | NA                            | NA                       | NA                        |
| $\text{Re}(\text{bpy})(\text{CO})_3\text{Cl}$ | 0.05 mM       | $\text{CO}_2$ | 3 h  | $0.94\pm 0.15$                | $6\pm 1$                 | NA                        |
| $\text{Re}(\text{bpy})(\text{CO})_3\text{Cl}$ | 0.05 mM       | Ar            | 3 h  | NA                            | NA                       | NA                        |

**Table S5** TON for CO production for **4,4'-dipyrenyl-Re** and  $\text{Re}(\text{bpy})(\text{CO})_3\text{Cl}$  under a white LED light. Products below detectable limit are labelled as NA.

| Complex                                       | Concentration | Additive       | BIH   | Time | $n_{\text{co}}/\mu\text{mol}$ | $\text{TON}_{\text{CO}}$ | $\text{TON}_{\text{H}_2}$ |
|-----------------------------------------------|---------------|----------------|-------|------|-------------------------------|--------------------------|---------------------------|
| 4,4'-dipyrenyl-Re                             | 0.05 mM       | -              | 10 mM | 3 h  | $20.64\pm 0.75$               | $138\pm 5$               | NA                        |
| 4,4'-dipyrenyl-Re                             | 0.05 mM       | -              | 20 mM | 3 h  | $23.52\pm 0.6$                | $157\pm 4$               | NA                        |
| 4,4'-dipyrenyl-Re                             | 0.05 mM       | Pyrene(0.1mM)  | 10 mM | 3 h  | $19.8\pm 1.8$                 | $132\pm 12$              | NA                        |
| $\text{Re}(\text{bpy})(\text{CO})_3\text{Cl}$ | 0.05 mM       | -              | 10 mM | 3 h  | $0.94\pm 0.15$                | $6\pm 1$                 | NA                        |
| $\text{Re}(\text{bpy})(\text{CO})_3\text{Cl}$ | 0.05 mM       | Pyrene(0.1 mM) | 10 mM | 3 h  | $0.94\pm 0.23$                | $6\pm 1.5$               | NA                        |

**Table S6** TON for CO production vs. time for **4,4'-dipyrenyl-Re** and  $\text{Re}(\text{bpy})(\text{CO})_3\text{Cl}$  under a white LED light. Products below detectable limit are labelled as NA.

| Complex                                       | Concentration | Time  | $n_{\text{co}}/\mu\text{mol}$ | $\text{TON}_{\text{CO}}$ | $\text{TON}_{\text{H}_2}$ |
|-----------------------------------------------|---------------|-------|-------------------------------|--------------------------|---------------------------|
| 4,4'-dipyrenyl-Re                             | 0.05 mM       | 0.5 h | $3.64\pm 0.15$                | $24\pm 1$                | NA                        |
| 4,4'-dipyrenyl-Re                             | 0.05 mM       | 1 h   | $8.41\pm 0.45$                | $56\pm 3$                | NA                        |
| 4,4'-dipyrenyl-Re                             | 0.05 mM       | 3 h   | $20.64\pm 0.75$               | $138\pm 5$               | NA                        |
| 4,4'-dipyrenyl-Re                             | 0.05 mM       | 6 h   | $21.50\pm 0.3$                | $143\pm 2$               | 0.6                       |
| 4,4'-dipyrenyl-Re                             | 0.05 mM       | 10 h  | $22.05\pm 0.45$               | $147\pm 3$               | 1                         |
| 4,4'-dipyrenyl-Re                             | 0.05 mM       | 12 h  | $22.35\pm 0.3$                | $149\pm 2$               | 1                         |
| $\text{Re}(\text{bpy})(\text{CO})_3\text{Cl}$ | 0.05 mM       | 0.5 h | $0.32\pm 0.08$                | $2\pm 0.5$               | NA                        |
| $\text{Re}(\text{bpy})(\text{CO})_3\text{Cl}$ | 0.05 mM       | 1 h   | $0.60\pm 0.3$                 | $4\pm 2$                 | NA                        |
| $\text{Re}(\text{bpy})(\text{CO})_3\text{Cl}$ | 0.05 mM       | 3 h   | $0.94\pm 0.15$                | $6\pm 1$                 | NA                        |
| $\text{Re}(\text{bpy})(\text{CO})_3\text{Cl}$ | 0.05 mM       | 6 h   | $2.62\pm 0.15$                | $17\pm 1$                | NA                        |
| $\text{Re}(\text{bpy})(\text{CO})_3\text{Cl}$ | 0.05 mM       | 10 h  | $2.69\pm 0.3$                 | $18\pm 2$                | NA                        |
| $\text{Re}(\text{bpy})(\text{CO})_3\text{Cl}$ | 0.05 mM       | 12 h  | $2.99\pm 0.15$                | $20\pm 1$                | NA                        |

**Table S7** TON for CO production vs. sacrificial reductants for **4,4'-dipyrenyl-Re** and  $\text{Re}(\text{bpy})(\text{CO})_3\text{Cl}$  under a white LED light. Products below detectable limit are labelled as NA.

| Complex                                       | Concentration | Electron donor | Time | $n_{\text{CO}}/\mu\text{mol}$ | $n_{\text{H}_2}/\mu\text{mol}$ |
|-----------------------------------------------|---------------|----------------|------|-------------------------------|--------------------------------|
| 4,4'-dipyrenyl-Re                             | 0.1 mM        | BIH            | 3 h  | 9.99±1.05                     | NA                             |
| 4,4'-dipyrenyl-Re                             | 0.1 mM        | TEOA           | 3 h  | 8.0±0.75                      | NA                             |
| 4,4'-dipyrenyl-Re                             | 0.1 mM        | TEOA, BIH      | 3 h  | 22.08±1.8                     | NA                             |
| $\text{Re}(\text{bpy})(\text{CO})_3\text{Cl}$ | 0.1 mM        | BIH            | 3 h  | 1.68±0.36                     | NA                             |
| $\text{Re}(\text{bpy})(\text{CO})_3\text{Cl}$ | 0.1 mM        | TEOA           | 3 h  | 1.75±0.5                      | NA                             |
| $\text{Re}(\text{bpy})(\text{CO})_3\text{Cl}$ | 0.1 mM        | TEOA, BIH      | 3 h  | 2.38±0.6                      | NA                             |

**Table S8** TON for CO production vs. concentration for **4,4'-dipyrenyl-Re** and  $\text{Re}(\text{bpy})(\text{CO})_3\text{Cl}$  under a white LED light. Products below detectable limit are labelled as NA.

| Complex                                       | Concentration | $n_{\text{CO}}/\mu\text{mol}$ | $\text{TON}_{\text{CO}}$ | $\text{TON}_{\text{H}_2}$ |
|-----------------------------------------------|---------------|-------------------------------|--------------------------|---------------------------|
| 4,4'-dipyrenyl-Re                             | 0.0125 mM     | 6.05±0.15                     | 161±4                    | NA                        |
| 4,4'-dipyrenyl-Re                             | 0.025 mM      | 11.15±0.225                   | 149±3                    | 1.5                       |
| 4,4'-dipyrenyl-Re                             | 0.05 mM       | 20.64±0.75                    | 138±5                    | NA                        |
| 4,4'-dipyrenyl-Re                             | 0.1 mM        | 22.08±1.8                     | 74±6                     | NA                        |
| 4,4'-dipyrenyl-Re                             | 0.2 mM        | 38.41±2.4                     | 64±4                     | NA                        |
| $\text{Re}(\text{bpy})(\text{CO})_3\text{Cl}$ | 0.0125 mM     | 0.23±0.02                     | 6±0.5                    | 0.6                       |
| $\text{Re}(\text{bpy})(\text{CO})_3\text{Cl}$ | 0.025 mM      | 0.49±0.08                     | 6±1                      | 0.4                       |
| $\text{Re}(\text{bpy})(\text{CO})_3\text{Cl}$ | 0.05 mM       | 0.94±0.15                     | 6±1                      | NA                        |
| $\text{Re}(\text{bpy})(\text{CO})_3\text{Cl}$ | 0.1 mM        | 2.38±0.6                      | 8±2                      | NA                        |
| $\text{Re}(\text{bpy})(\text{CO})_3\text{Cl}$ | 0.2 mM        | 5.74±0.6                      | 10±1                     | NA                        |

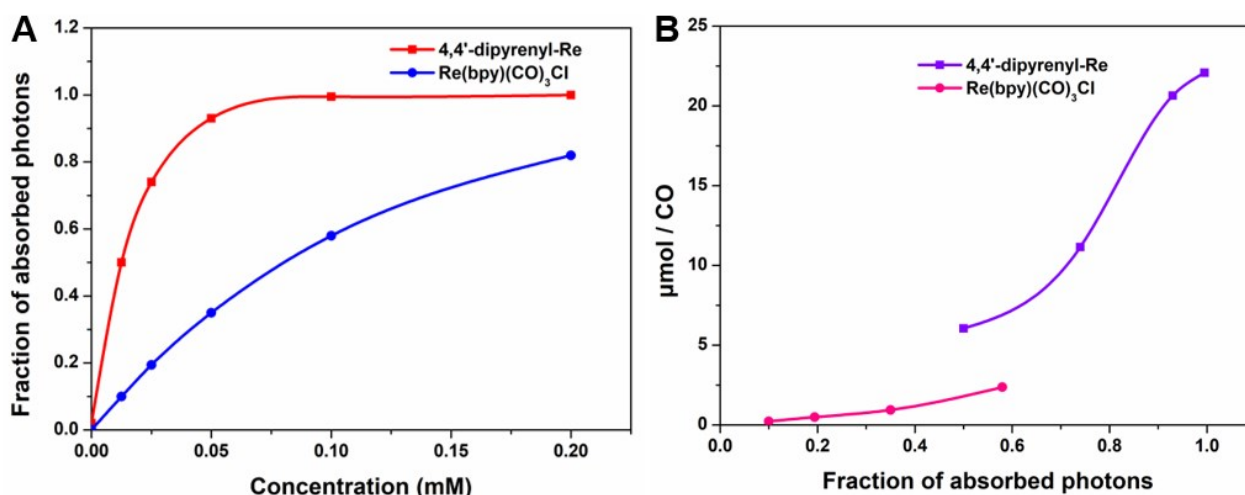

**Fig. S2** The effects on fraction of absorbed photons at different concentrations (A) and the number of moles of CO produced under different fraction of absorbed photons (B) for 4,4'-dipyrenyl-Re and  $\text{Re}(\text{bpy})(\text{CO})_3\text{Cl}$ . (The extinction coefficients of the two catalysts are  $23323 \text{ M}^{-1} \text{ cm}^{-1}$  (4,4'-dipyrenyl-Re) and  $3754 \text{ M}^{-1} \text{ cm}^{-1}$  ( $\text{Re}(\text{bpy})(\text{CO})_3\text{Cl}$ ), respectively).

**Table S9** Reduced concentration ratio% and reduced  $n_{\text{CO}}$  ratio% for **4,4'-dipyrenyl-Re** and  $\text{Re}(\text{bpy})(\text{CO})_3\text{Cl}$  under a white LED light

| Complex                                       | Concentration | Reduced concentration ratio % | $n_{\text{CO}}/\mu\text{mol}$ | Reduced $n_{\text{CO}}$ ratio% |
|-----------------------------------------------|---------------|-------------------------------|-------------------------------|--------------------------------|
| 4,4'-dipyrenyl-Re                             | 0.1 mM        | 87.5%                         | 22.08±1.8                     | 72.6%                          |
|                                               | 0.0125 mM     |                               | 6.05±0.15                     |                                |
| $\text{Re}(\text{bpy})(\text{CO})_3\text{Cl}$ | 0.1 mM        | 87.5%                         | 2.38±0.6                      | 90.3%                          |
|                                               | 0.0125 mM     |                               | 0.23±0.02                     |                                |

**Table S10** TON for CO production for **4,4'-dipyrenyl-Re** and  $\text{Re}(\text{bpy})(\text{CO})_3\text{Cl}$ . Products below detectable limit are labelled as NA.

| Complex                                       | Concentration | Irridation light              | Time  | $n_{\text{CO}}/\mu\text{mol}$ | $n_{\text{H}_2}/\mu\text{mol}$ |
|-----------------------------------------------|---------------|-------------------------------|-------|-------------------------------|--------------------------------|
| 4,4'-dipyrenyl-Re                             | 0.2 mM        | Xenon lamp $\lambda = 420$ nm | 0.5 h | 29.08±2                       | NA                             |
| $\text{Re}(\text{bpy})(\text{CO})_3\text{Cl}$ | 0.2 mM        | Xenon lamp $\lambda = 420$ nm | 0.5 h | 4.56±1.4                      | NA                             |



**Table S11** TON for CO production for 4,4'-dipyrenyl-Re and Re(bpy)(CO)<sub>3</sub>Cl under sunlight irradiation or Xenon lamp or White LED. Products below detectable limit are labelled as NA.

| Complex                     | Concentration | Irridation                          | Time | nco/ $\mu$ mol    | TON <sub>co</sub> | TON <sub>H<sub>2</sub></sub> |
|-----------------------------|---------------|-------------------------------------|------|-------------------|-------------------|------------------------------|
| 4,4'-dipyrenyl-Re           | 0.0125 mM     | Sunny                               | 3 h  | 13.12 $\pm$ 1.35  | 350 $\pm$ 36      | NA                           |
| 4,4'-dipyrenyl-Re           | 0.0125 mM     | Cloudy                              | 3 h  | 6 $\pm$ 0.38      | 160 $\pm$ 10      | 1.5                          |
| 4,4'-dipyrenyl-Re           | 0.0125 mM     | White LED                           | 3 h  | 6.05 $\pm$ 0.15   | 161 $\pm$ 4       | NA                           |
| 4,4'-dipyrenyl-Re           | 0.0125 mM     | White LED                           | 6 h  | 6.49 $\pm$ 0.11   | 173 $\pm$ 3       | NA                           |
| 4,4'-dipyrenyl-Re           | 0.0125 mM     | Xenon lamp<br>( $\lambda$ > 400 nm) | 3 h  | 13.24 $\pm$ 0.19  | 353 $\pm$ 5       | NA                           |
| 4,4'-dipyrenyl-Re           | 0.0125 mM     | Xenon lamp<br>( $\lambda$ > 400 nm) | 6 h  | 13.39 $\pm$ 0.23  | 357 $\pm$ 6       | NA                           |
| 4,4'-dipyrenyl-Re           | 0.0125 mM     | Xenon lamp<br>( $\lambda$ = 420 nm) | 3 h  | 12.86 $\pm$ 0.49  | 343 $\pm$ 13      | 2                            |
| Re(bpy)(CO) <sub>3</sub> Cl | 0.0125 mM     | Sunny                               | 3 h  | 0.83 $\pm$ 0.08   | 22 $\pm$ 2        | NA                           |
| Re(bpy)(CO) <sub>3</sub> Cl | 0.0125 mM     | Cloudy                              | 3 h  | 0.15 $\pm$ 0.038  | 4 $\pm$ 1         | 0.3                          |
| Re(bpy)(CO) <sub>3</sub> Cl | 0.0125 mM     | Xenon lamp<br>( $\lambda$ > 400 nm) | 3 h  | 0.83 $\pm$ 0.08   | 22 $\pm$ 2        | 0.4                          |
| Re(bpy)(CO) <sub>3</sub> Cl | 0.0125 mM     | Xenon lamp<br>( $\lambda$ = 420 nm) | 3 h  | 0.7935 $\pm$ 0.08 | 21 $\pm$ 2        | 0.5                          |

**Table S12** CO<sub>2</sub> photo-reduction by **4,4'-dipyrenyl-Re** or Re(bpy)(CO)<sub>3</sub>Cl (3.125  $\mu$ M) as catalyst and RuBPY (0.5 mM) as photosensitizer in 3 h driven by long-arc xenon lamp. Products below detectable limit are labelled as NA.

| Catalyst                                    | Photosensitizer | nco/ $\mu$ mol   | TON <sub>CO</sub> | n <sub>H<sub>2</sub></sub> / $\mu$ mol | TON <sub>H<sub>2</sub></sub> |
|---------------------------------------------|-----------------|------------------|-------------------|----------------------------------------|------------------------------|
| 4,4'-dipyrenyl-Re (3.125 $\mu$ M)           | -               | 0.716 $\pm$ 0.03 | 76 $\pm$ 3        | NA                                     | NA                           |
| 4,4'-dipyrenyl-Re (3.125 $\mu$ M)           | RuBPY           | 12.81 $\pm$ 0.3  | 1376 $\pm$ 32     | NA                                     | NA                           |
| Re(bpy)(CO) <sub>3</sub> Cl (3.125 $\mu$ M) | -               | NA               | < 1               | NA                                     | NA                           |
| Re(bpy)(CO) <sub>3</sub> Cl (3.125 $\mu$ M) | RuBPY           | 7.875 $\pm$ 0.26 | 840 $\pm$ 28      | NA                                     | NA                           |
| -                                           | RuBPY           | 0.452            |                   | 0.213                                  |                              |

**Table S13** The concentrations of the photocatalyst and photosensitizer were investigated in the reported photocatalytic CO<sub>2</sub> to CO system

| Catalyst                                    | Photosensitizer  | Light source           | Sacrificial reagent | TON <sub>CO</sub> | Reference <sup>S1-14</sup> |
|---------------------------------------------|------------------|------------------------|---------------------|-------------------|----------------------------|
| 0.0125 mM Re                                | -                | white-light LED        | BIH                 | 161±4             | This work                  |
|                                             | -                | sunny sunlight         | BIH                 | 350±36            |                            |
|                                             | RuBPY            | Xe lamp                | BIH                 | 1376±32           |                            |
| 0.05 mM cis-Re <sub>2</sub> Cl <sub>2</sub> | -                | Xe lamp                | BIH                 | 95                | S1                         |
| 0.5 mM Re                                   | -                | white-light LED (13 W) | BIH                 | 102               | S2                         |
| 0.05 mM Re                                  | -                | halogen lamp           | TEOA                | 230               | S3                         |
| 0.04 Ru                                     | -                | Xe lamp                | BIH                 | 160               | S4                         |
| 0.5 mM Re                                   | 0.5 mM Ru        | λ= 470 nm LED          | BIH                 | 100               | S5                         |
| 0.05 mM Re                                  | 0.15 mM Re       | Hg lamp                | BIH                 | 563               | S6                         |
| 0.2 mM Re                                   | 0.2 mM Ir        | 150 W Xe lamp          | BIH                 | 51                | S7                         |
| 2 μM Fe                                     | 0.2 mM Ir        | λ > 420 nm             | TEA                 | 140               | S8                         |
| 0.05 mM Fe                                  | 0.5 mM Cu        | Hg lamp                | BIH                 | 273               | S9                         |
| 0.05 mM Fe                                  | 0.02 mM purpurin | blue LED               | BIH                 | 520               | S10                        |
| 0.03 mM Ni                                  | 0.5 mM Ru        | λ= 450 nm              | BIH                 | 112               | S11                        |
| 0.03 mM Ni                                  | 0.5 mM Ru        | λ= 450 nm              | BIH                 | 713               | S12                        |
| 0.05 mM Co                                  | 0.4 mM Ru        | blue LED λ= 460 nm     | TEA                 | >900              | S13                        |
| 0.05 mM Co                                  | 0.2 mM Ir        | λ > 460 nm             | TEA                 | 270               | S14                        |

#### 4. Photoluminescence experiments

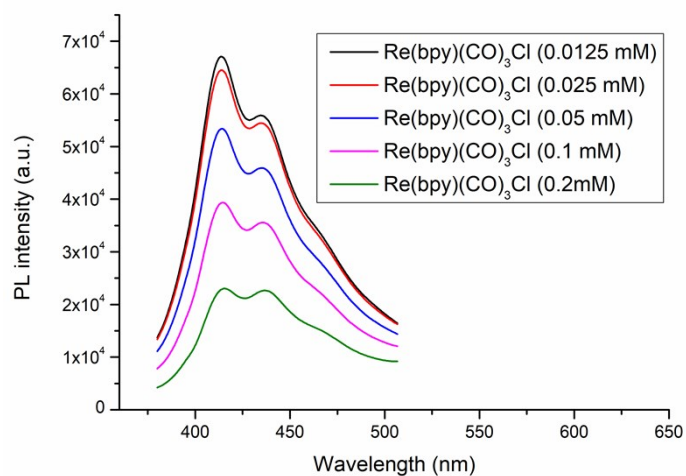

**Fig. S3** Photoluminescence experiments at different concentrations of  $\text{Re}(\text{bpy})(\text{CO})_3\text{Cl}$ .

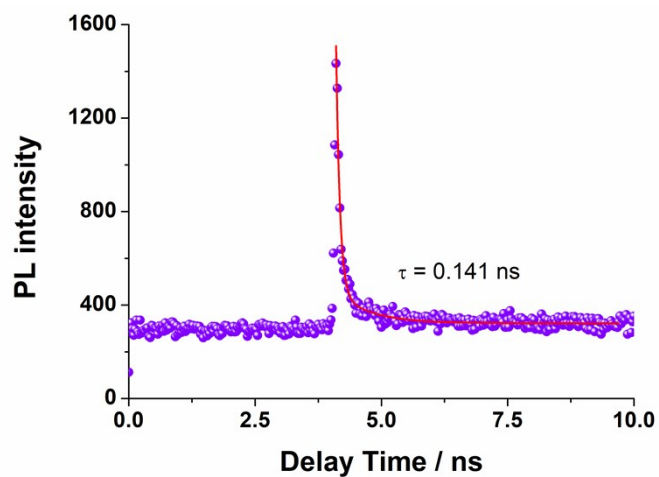

**Fig. S4** Time-resolved emission decay of  $4,4'$ -dipyrenyl-Re (1 mM) at 650 nm upon excitation at 375 nm in DMF solution at room temperature.

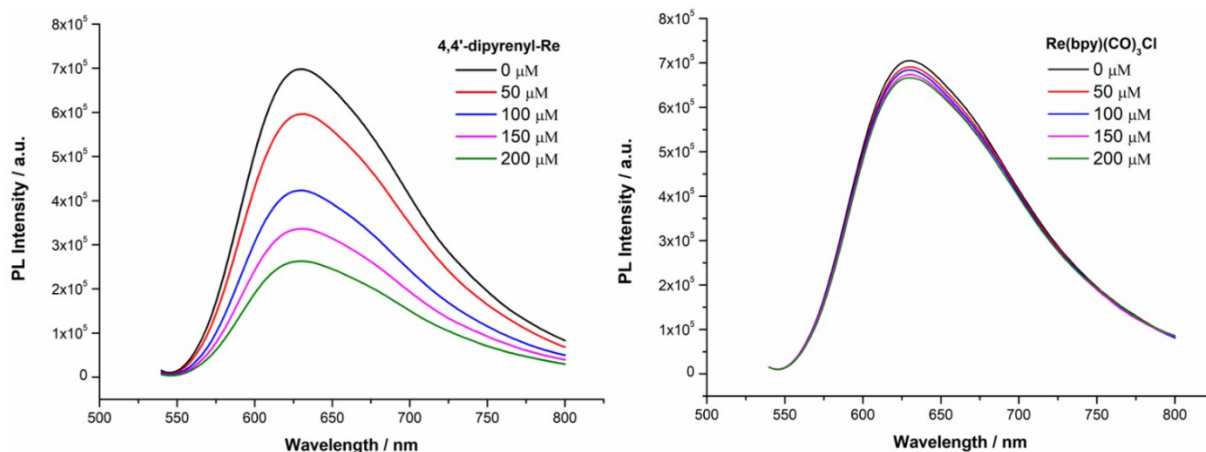

**Fig. S5** Emission spectra of Ru(bpy)<sub>3</sub>(Cl)<sub>2</sub>·6H<sub>2</sub>O (50 μM) in DMF solution excitation at 450 nm with increasing the 4,4'-dipyrenyl-Re (left) and Re(bpy)(CO)<sub>3</sub>Cl (right).

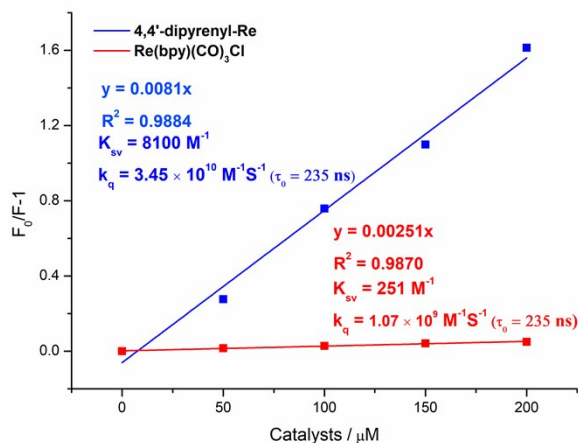

**Fig. S6** Linear plot of the emission ratio versus 4,4'-dipyrenyl-Re concentration according to the Stern-Volmer equation.

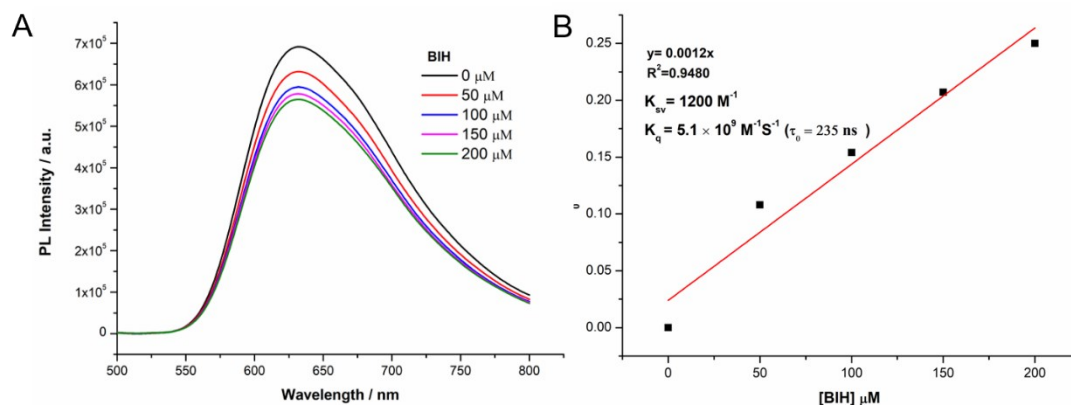

**Fig. S7** (A) Emission spectra of Ru(bpy)<sub>3</sub>(Cl)<sub>2</sub>·6H<sub>2</sub>O (50 μM) in DMF solution excitation at 450 nm with increasing the BIH. (B) Linear plot of the emission ratio versus BIH concentration according to the Stern-Volmer equation.

## 5. Transient absorption spectroscopy

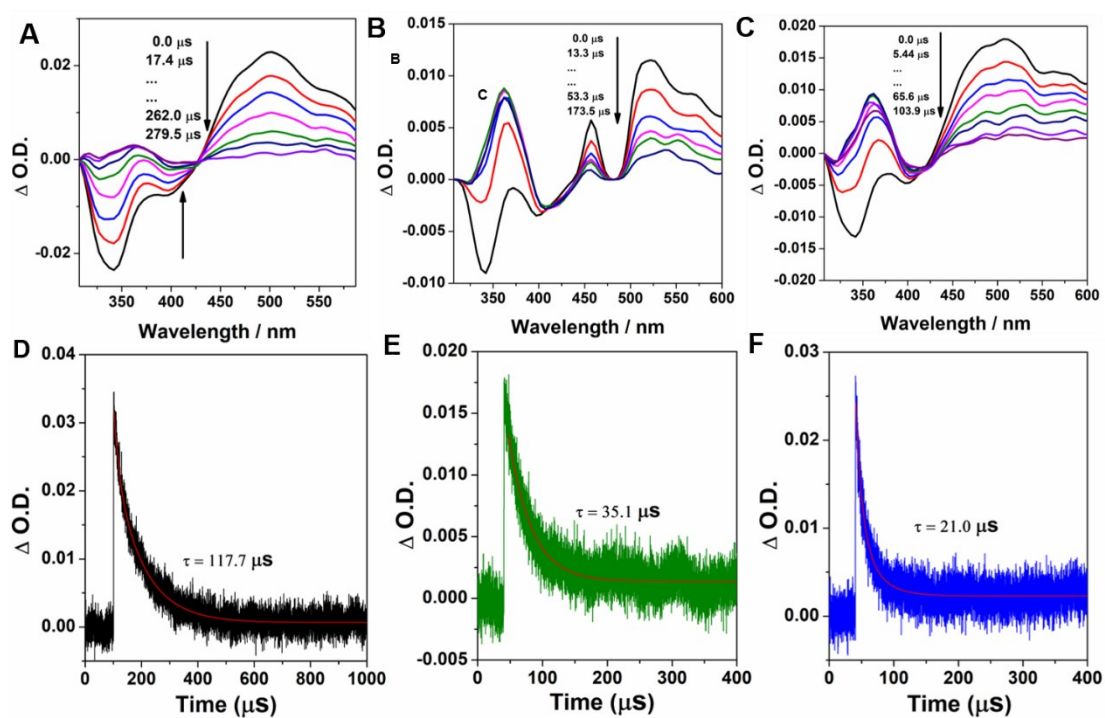

**Fig. S8** Transient absorption spectra of 4,4'-dipyrenyl-Re at specified times after pulsed laser excitation ( $\lambda_{\text{exc}} = 410$  nm) in DMF (A) under Ar purge and 4,4'-dipyrenyl-Re with BIH under Ar purge (B) or CO<sub>2</sub> purge (C) and these corresponding decay at 520 nm (D, E, F).

## 6. Photo-electrochemical measurements

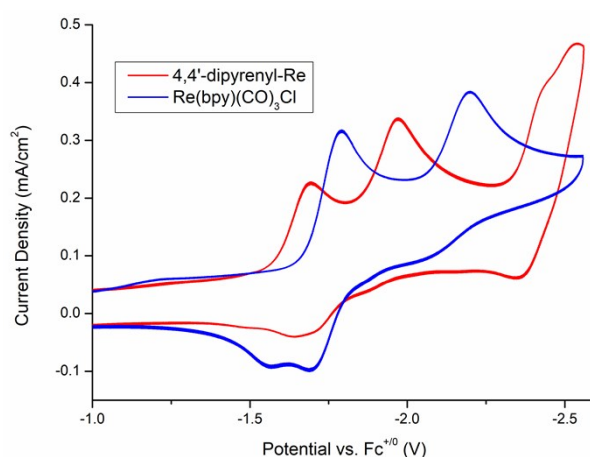

**Fig. S9** Cyclic voltammograms of 1 mM **4,4'-dipyrenyl-Re** (red) and 1 mM **Re(bpy)(CO)<sub>3</sub>Cl** (blue) in Ar atmosphere at scan rate of 100 mVs<sup>-1</sup>. Versus Fc/Fc<sup>+</sup> in DMF solution and 0.1 M NBu<sub>4</sub>PF<sub>6</sub> as a supporting electrolyte.

**Table S14** Optical and Electrochemical Properties of 4,4'-dipyrenyl-Re and Re(bpy)(CO)<sub>3</sub>Cl

| Catalyst                    | $\lambda_{\text{abs}}$ (nm) <sup>a</sup> | $\lambda_{\text{onset}}$ (nm) <sup>b</sup> | $\epsilon$ (M <sup>-1</sup> cm <sup>-1</sup> ) <sup>a</sup> | $E_{\text{g, opt}}$ (eV) <sup>c</sup> | $E_{\text{red, onset}}$ (V) <sup>d</sup> | $E_{\text{LUMO}}$ (eV) <sup>d</sup> | $E_{\text{HOMO}}$ (eV) <sup>e</sup> | $E_{\text{g, cal}}$ (eV) <sup>f</sup> |
|-----------------------------|------------------------------------------|--------------------------------------------|-------------------------------------------------------------|---------------------------------------|------------------------------------------|-------------------------------------|-------------------------------------|---------------------------------------|
| 4,4'-dipyrenyl-Re           | 395                                      | 457                                        | 23323                                                       | 2.71                                  | -1.57                                    | -3.23                               | -5.94                               | 3.07                                  |
| Re(bpy)(CO) <sub>3</sub> Cl | 370                                      | 443                                        | 3754                                                        | 3.35                                  | -1.68                                    | -3.12                               | -6.47                               | 3.71                                  |

<sup>a</sup> $\lambda_{\text{max}}$  and  $\epsilon$  (M<sup>-1</sup> cm<sup>-1</sup>): absorption maximum at longest wavelength. <sup>b</sup> $\lambda_{\text{onset}}$ : the wavelength of the onsets were measured from the UV-vis absorption spectra. <sup>c</sup> $E_{\text{g, opt}}$ : optical energy gaps were estimated from the wavelength of the onsets of their UV-vis absorption spectra. <sup>d</sup>LUMO values were derived from the onset of reduction potential,  $-(E_{\text{LUMO}}) = 4.8 + E_{\text{onset, red}}$  (vs. Fc/Fc<sup>+</sup>). <sup>e</sup>HOMO levels were estimated from the optical gap ( $E_{\text{g, opt}}$ ) and the respective LUMO levels,  $E_{\text{HOMO}} = E_{\text{LUMO}} - E_{\text{g, opt}}$ . <sup>f</sup>Calculations were performed at the Time-dependent DFT.

**Table S15** Reduction potentials vs. Fc<sup>+0</sup> (V) for the 1.0 mM **4,4'-dipyrenyl-Re** and **Re(bpy)(CO)<sub>3</sub>Cl** complex under Ar.

| catalyst                    | Ar                        |                           |                           |
|-----------------------------|---------------------------|---------------------------|---------------------------|
|                             | 1 <sup>st</sup> reduction | 2 <sup>nd</sup> reduction | 3 <sup>rd</sup> reduction |
| 4,4'-dipyrenyl-Re           | -1.69                     | -1.97                     | -2.45                     |
| Re(bpy)(CO) <sub>3</sub> Cl | -1.79                     | -2.2                      | -                         |

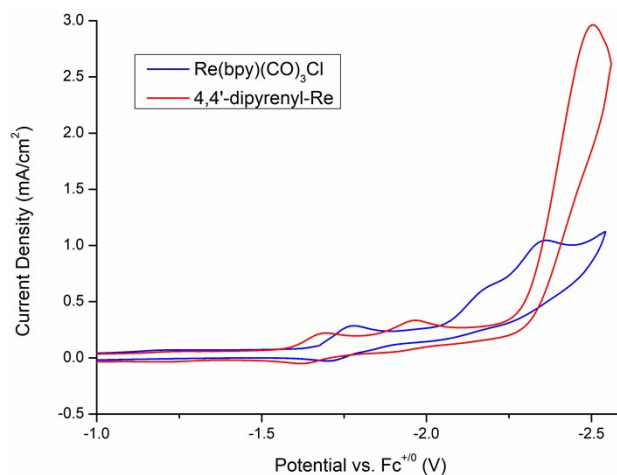

**Fig. S10** CVs of 1.0 mM **4,4'-dipyrenyl-Re** and  $\text{Re}(\text{bpy})(\text{CO})_3\text{Cl}$  complex recorded at  $0.1 \text{ V s}^{-1}$  under  $\text{CO}_2$  in DMF (0.1 M  $\text{NBu}_4\text{PF}_6$ ).

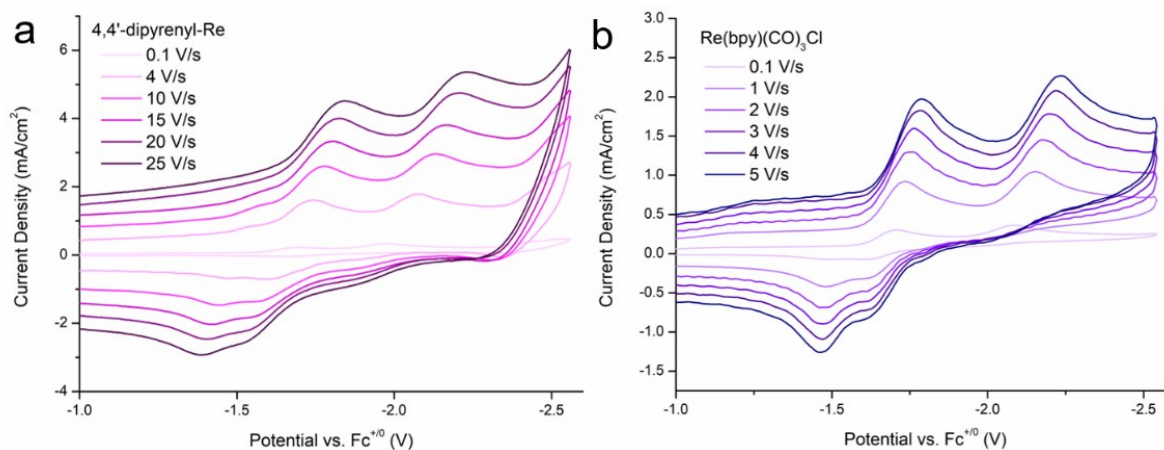

**Fig. S11** Catalytic scan rate dependence studies for the **4,4'-dipyrenyl-Re** (left, **a**) and  $\text{Re}(\text{bpy})(\text{CO})_3\text{Cl}$  (right, **b**) complexes in Ar-saturated DMF/0.1M  $\text{NBu}_4\text{PF}_6$  solutions.

## 7. ESI-HRMS spectra and FT-IR spectra

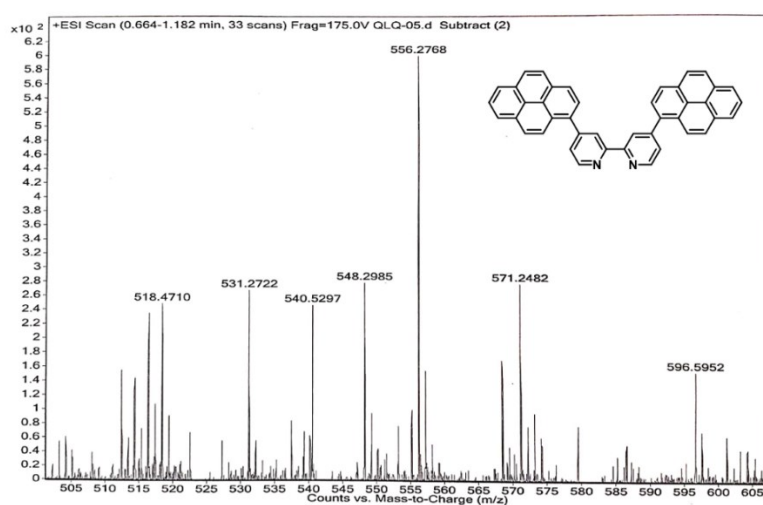

Fig. S12 ESI-HRMS spectra of 4,4'-di(pyren-1-yl)-2,2'-bipyridine.

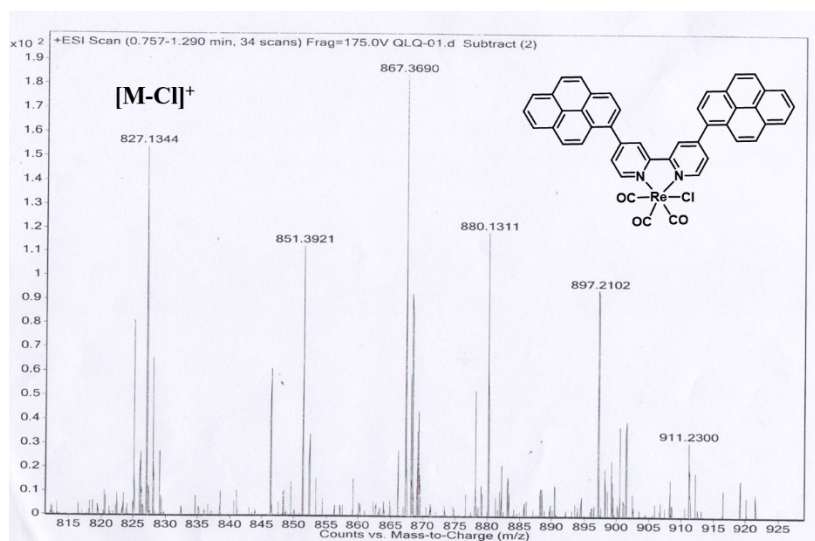

Fig. S13 ESI-HRMS spectra of Re[4,4'-di(pyren-1-yl)-2,2'-bipyridine](CO)<sub>3</sub>Cl.



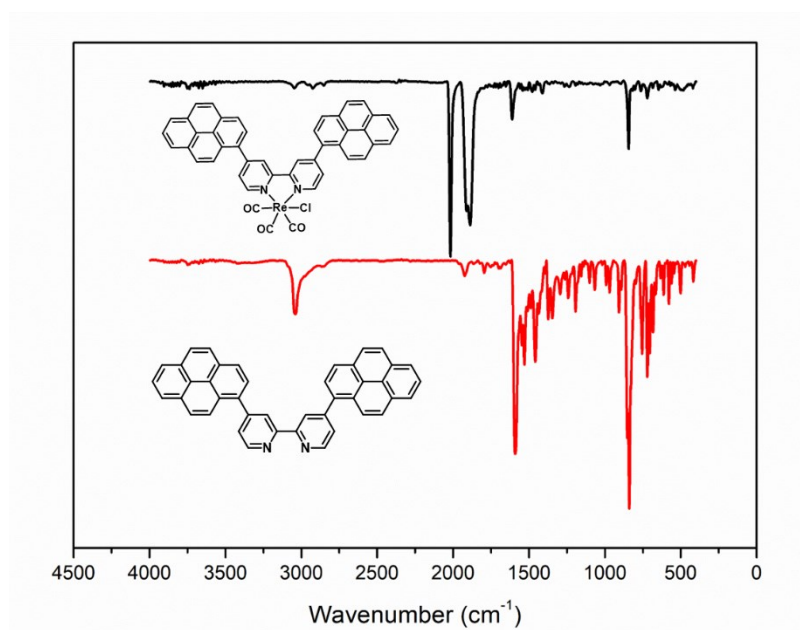

**Fig. S14** FT-IR spectra of 4,4'-di(pyren-1-yl)-2,2'-bipyridine and Re[4,4'-di(pyren-1-yl)-2,2'-bipyridine](CO)<sub>3</sub>Cl.

## 8. Computational details

All of the theoretical calculations were performed with the Gaussian 09 program.<sup>S15</sup> Geometry optimizations and energy gap calculations were performed based on the crystal structure and used DFT method B3LYP with Lanl2dz basis for Re atom and 6-31G(d) basis for other atoms. SMD solvation model was used to account for solvent (N,N-dimethylformamide) effects.

## 9. NMR spectra

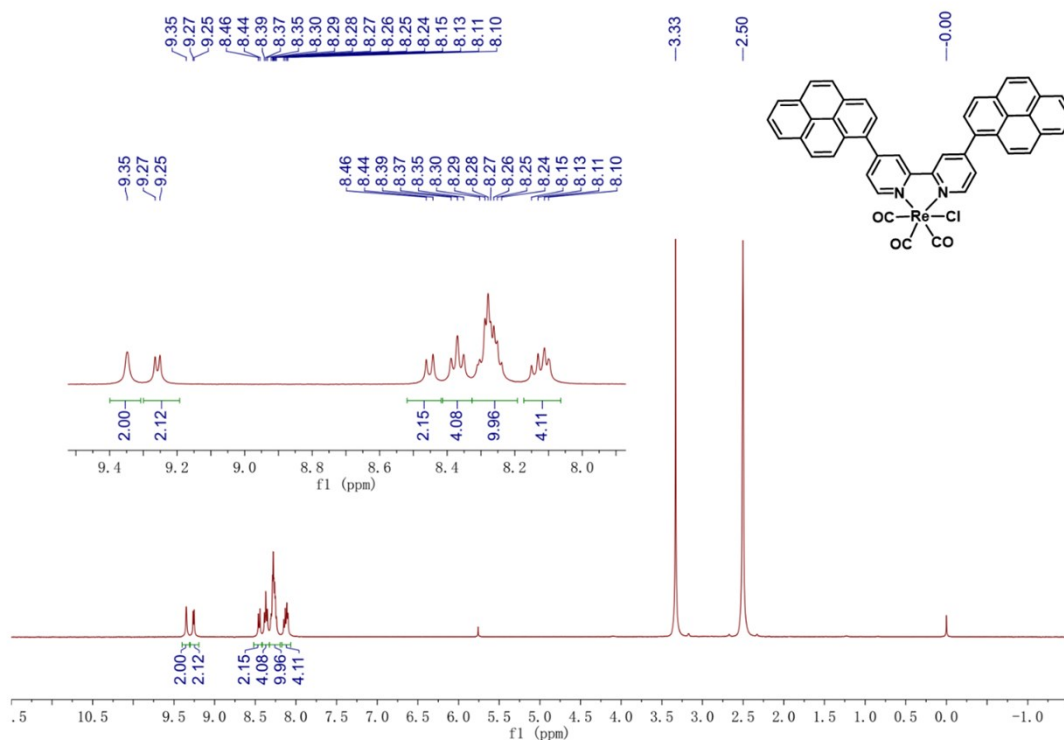

**<sup>1</sup>H NMR spectrum of 4,4'-dipyrenyl-Re**

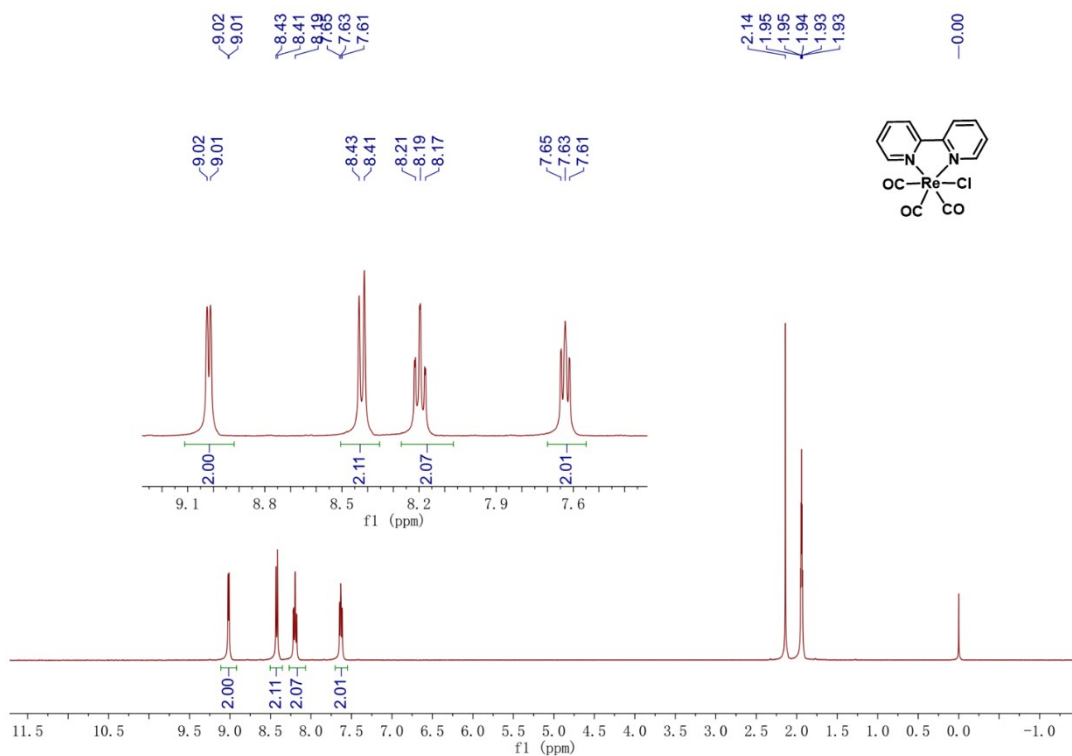

**<sup>1</sup>H NMR spectrum of Re(bpy)(CO)<sub>3</sub>Cl**

## 10. Supplementary references

- S1. N. P. Liyanage, W. Yang, S. Guertin, S. Sinha Roy, C. A. Carpenter, R. E. Adams, R. H. Schmehl, J. H. Delcamp and J. W. Jurss, *Chem. Commun.*, 2019, **55**, 993-996.
- S2. A. Maurin, C.-O. Ng, L. Chen, T.-C. Lau, M. Robert and C.-C. Ko, *Dalton Trans.*, 2016, **45**, 14524-14529.
- S3. D. R. Whang, D. H. Apaydin, S. Y. Park and N. S. Sariciftci, *J. Catal.*, 2018, **363**, 191-196.
- S4. S. K. Lee, M. Kondo, M. Okamura, T. Enomoto, G. Nakamura and S. Masaoka, *J. Am. Chem. Soc.*, 2018, **140**, 16899-16903.
- S5. P. L. Cheung, S. C. Kapper, T. Zeng, M. E. Thompson and C. P. Kubiak, *J. Am. Chem. Soc.*, 2019, **141**, 14961-14965.
- S6. T. Morimoto, C. Nishiura, M. Tanaka, J. Rohacova, Y. Nakagawa, Y. Funada, K. Koike, Y. Yamamoto, S. Shishido, T. Kojima, T. Saeki, T. Ozeki and O. Ishitani, *J. Am. Chem. Soc.*, 2013, **135**, 13266-13269.
- S7. A. J. Huckaba, E. A. Sharpe and J. H. Delcamp, *Inorg. Chem.*, 2016, **55**, 682-690.
- S8. J. Bonin, M. Robert and M. Routier, *J. Am. Chem. Soc.*, 2014, **136**, 16768-16771.
- S9. H. Takeda, K. Ohashi, A. Sekine and O. Ishitani, *J. Am. Chem. Soc.*, 2016, **138**, 4354-4357.
- S10. Z. Guo, S. Cheng, C. Cometto, E. Anxolabéhère-Mallart, S.-M. Ng, C.-C. Ko, G. Liu, L. Chen, M. Robert and T.-C. Lau, *J. Am. Chem. Soc.*, 2016, **138**, 9413-9416.
- S11. D. Hong, T. Kawanishi, Y. Tsukakoshi, H. Kotani, T. Ishizuka and T. Kojima, *J. Am. Chem. Soc.*, 2019, **141**, 20309-20317.
- S12. D. Hong, Y. Tsukakoshi, H. Kotani, T. Ishizuka and T. Kojima, *J. Am. Chem. Soc.*, 2017, **139**, 6538-6541.
- S13. S. L.-F. Chan, T. L. Lam, C. Yang, S.-C. Yan and N. M. Cheng, *Chem. Commun.*, 2015, **51**, 7799-7801.
- S14. L. Chen, Z. Guo, X.-G. Wei, C. Gallenkamp, J. Bonin, E. Anxolabéhère-Mallart, K.-C. Lau, T.-C. Lau and M. Robert, *J. Am. Chem. Soc.*, 2015, **137**, 10918-10921.
- S15. Gaussian 09, revision D.01, M. J. Frisch, G. W. Trucks, H. B. Schlegel, G. E. Scuseria, M. A. Robb, J. R. Cheeseman, G. Scalmani, V. Barone, B. Mennucci, G. A. Petersson, H. Nakatsuji, M. Caricato, X. Li, H. P. Hratchian, A. F. Izmaylov, J. Bloino, G. Zheng, J. L. Sonnenberg, M. Hada, M. Ehara, K. Toyota, R. Fukuda, J. Hasegawa, M. Ishida, T. Nakajima, Y. Honda, O. Kitao, H. Nakai, T. Vreven, J. A. Montgomery, Jr., J. E. Peralta, F. Ogliaro, M. Bearpark, J. J. Heyd, E. Brothers, K. N. Kudin, V. N. Staroverov, R. Kobayashi, J. Normand, K. Raghavachari, A. Rendell, J. C. Burant, S. S. Iyengar, J. Tomasi, M. Cossi, N. Rega, J. M. Millam, M. Klene, J. E. Knox, J. B. Foresman and D. J. Fox. (Gaussian, 2009).
